# Supplementary material for: The evaluation of sea cucumber (Acaudina leucoprocta) peptide on sex hormone regulation in normal and premature ovarian failure female mice
Source: Royal Society of Chemistry journal article supplement (doi:10.1039/d2fo01707e), 2022-12-27
Supplement: d2fo01707e1.pdf [file d2fo01707e1.pdf]

## Supplementary materials

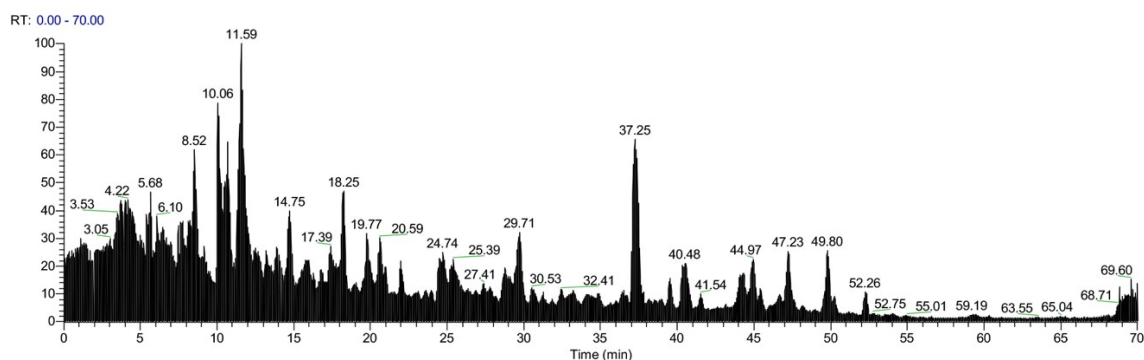

Figure S1 Total ion chromatogram of SCP

Table S1 The total 255 peptides were identified from SCP by UPLC-QTOF-MS.

|    | Peptide          | ALC (%) | Area                 | m/z    | Retention time (min) | Mass    | ppm  |
|----|------------------|---------|----------------------|--------|----------------------|---------|------|
| 1  | K(+42.01)GPGAG   | 82.7    | 1.01×10 <sup>9</sup> | 528.28 | 1.07                 | 527.27  | -2   |
| 2  | AVGPGAG          | 80.5    | 1.01×10 <sup>9</sup> | 528.28 | 1.07                 | 527.27  | -2   |
| 3  | LGYP             | 84.9    | 4.06×10 <sup>8</sup> | 449.23 | 24.47                | 448.23  | -3.8 |
| 4  | GPAGPM           | 80.3    | 3.15×10 <sup>8</sup> | 529.24 | 11.42                | 528.24  | -3.4 |
| 5  | K(+42.01)VGPQG   | 86.3    | 2.32×10 <sup>8</sup> | 627.34 | 17.39                | 626.34  | -3.4 |
| 6  | K(+42.01)GYP     | 83.3    | 1.74×10 <sup>8</sup> | 506.26 | 29.19                | 505.25  | -2.9 |
| 7  | K(+42.01)VGPQ    | 89.5    | 1.00×10 <sup>8</sup> | 570.32 | 16.39                | 569.32  | -2.1 |
| 8  | K(+42.01)GYPQ    | 86.7    | 9.90×10 <sup>7</sup> | 634.32 | 24.77                | 633.31  | -3.6 |
| 9  | PAYP             | 85      | 9.81×10 <sup>7</sup> | 447.22 | 12.52                | 446.22  | -2.9 |
| 10 | AAGL             | 92.6    | 9.72×10 <sup>7</sup> | 331.20 | 1.95                 | 330.19  | -2.4 |
| 11 | VGLA             | 81.2    | 8.04×10 <sup>7</sup> | 359.23 | 10.44                | 358.22  | -3.4 |
| 12 | GPAGPL           | 82.1    | 7.91×10 <sup>7</sup> | 511.29 | 20.65                | 510.28  | -3.3 |
| 13 | VGGL             | 82.6    | 7.31×10 <sup>7</sup> | 345.21 | 8.11                 | 344.21  | -3.4 |
| 14 | QSGL             | 87.1    | 7.21×10 <sup>7</sup> | 404.21 | 0.56                 | 403.21  | -2.9 |
| 15 | GLRGP            | 97.5    | 7.18×10 <sup>7</sup> | 250.15 | 3.98                 | 498.29  | -2.4 |
| 16 | QVGPA            | 91.9    | 6.41×10 <sup>7</sup> | 471.25 | 6.40                 | 470.25  | -2.6 |
| 17 | QASGL            | 83.2    | 6.35×10 <sup>7</sup> | 475.25 | 6.33                 | 474.24  | -2.8 |
| 18 | PDGLQ            | 82.1    | 6.22×10 <sup>7</sup> | 529.26 | 21.00                | 528.25  | -2.6 |
| 19 | QEGPVG           | 81      | 5.73×10 <sup>7</sup> | 586.28 | 8.35                 | 585.28  | -2.1 |
| 20 | TPVLG            | 92.1    | 5.67×10 <sup>7</sup> | 486.29 | 19.59                | 485.28  | -3.1 |
| 21 | QPGGL            | 80.7    | 5.58×10 <sup>7</sup> | 770.43 | 65.01                | 1538.84 | 5.4  |
| 22 | A(+42.01)AGPAGPM | 83.7    | 4.85×10 <sup>7</sup> | 713.33 | 16.33                | 712.32  | -1.8 |
| 23 | ATGL             | 83.7    | 4.78×10 <sup>7</sup> | 361.21 | 4.08                 | 360.20  | -2.3 |
| 24 | VGPEQ            | 84.6    | 4.60×10 <sup>7</sup> | 529.26 | 6.74                 | 528.25  | -0.8 |
| 25 | LAGP             | 86      | 4.46×10 <sup>7</sup> | 357.21 | 9.10                 | 356.21  | -2.4 |
| 26 | PAGL             | 80.3    | 4.46×10 <sup>7</sup> | 357.21 | 9.10                 | 356.21  | -2.4 |
| 27 | LGPM             | 85.4    | 4.41×10 <sup>7</sup> | 417.22 | 20.14                | 416.21  | -3   |
| 28 | QGLGAQ           | 83.5    | 3.80×10 <sup>7</sup> | 573.30 | 4.46                 | 572.29  | -2.2 |

|    |                   |      |                      |        |       |        |      |
|----|-------------------|------|----------------------|--------|-------|--------|------|
| 29 | FGAGT             | 80.9 | 3.72×10 <sup>7</sup> | 452.21 | 12.38 | 451.21 | -3   |
| 30 | A(+42.01)AGPAGPMG | 80.5 | 3.72×10 <sup>7</sup> | 770.35 | 16.19 | 769.34 | -2.2 |
| 31 | QAGGL             | 86.8 | 3.52×10 <sup>7</sup> | 445.24 | 6.78  | 444.23 | -2.5 |
| 32 | QAGL              | 86.7 | 3.50×10 <sup>7</sup> | 388.22 | 6.54  | 387.21 | -2.8 |
| 33 | AAGGL             | 81.4 | 3.48×10 <sup>7</sup> | 388.22 | 1.86  | 387.21 | -2.4 |
| 34 | ELGPM             | 82.5 | 3.27×10 <sup>7</sup> | 546.26 | 26.52 | 545.25 | -1.5 |
| 35 | K(+42.01)YPQ      | 90.8 | 3.16×10 <sup>7</sup> | 577.30 | 18.84 | 576.29 | -1.7 |
| 36 | YPQAV             | 84.4 | 3.16×10 <sup>7</sup> | 577.30 | 18.84 | 576.29 | -1.7 |
| 37 | K(+42.01)TGE      | 84.1 | 3.08×10 <sup>7</sup> | 476.23 | 3.40  | 475.23 | -2.4 |
| 38 | PVGP              | 86.2 | 3.03×10 <sup>7</sup> | 651.34 | 17.84 | 650.34 | -1.6 |
| 39 | VPGP              | 84.3 | 3.03×10 <sup>7</sup> | 369.21 | 7.80  | 368.21 | -3.1 |
| 40 | PAGPL             | 83.6 | 3.00×10 <sup>7</sup> | 454.26 | 15.60 | 453.26 | -2.5 |
| 41 | FGGAG             | 83   | 3.00×10 <sup>7</sup> | 408.19 | 0.39  | 407.18 | -2.6 |
| 42 | Q(+42.01)LVGP     | 91.5 | 2.66×10 <sup>7</sup> | 555.31 | 23.65 | 554.31 | -2.3 |
| 43 | PGRP              | 95.5 | 2.58×10 <sup>7</sup> | 213.63 | 5.58  | 425.24 | -2.8 |
| 44 | EVGP              | 85.4 | 2.51×10 <sup>7</sup> | 401.20 | 3.29  | 400.20 | -2.7 |
| 45 | SPGGPL            | 84.6 | 2.47×10 <sup>7</sup> | 527.28 | 15.78 | 526.28 | -2.6 |
| 46 | SPGGLP            | 81.3 | 2.47×10 <sup>7</sup> | 527.28 | 15.78 | 526.28 | -2.6 |
| 47 | QTGAL             | 81.2 | 2.30×10 <sup>7</sup> | 489.27 | 6.61  | 488.26 | -2.4 |
| 48 | LPTDL             | 91.2 | 2.10×10 <sup>7</sup> | 558.31 | 36.39 | 557.31 | -2.4 |
| 49 | PNPY              | 84.3 | 2.09×10 <sup>7</sup> | 490.23 | 7.36  | 489.22 | -2.1 |
| 50 | K(+42.01)VGE      | 88.8 | 1.92×10 <sup>7</sup> | 545.29 | 17.36 | 544.29 | -3.1 |
| 51 | QVGPVG            | 82.4 | 1.89×10 <sup>7</sup> | 556.31 | 16.26 | 555.30 | -3.3 |
| 52 | K(+42.01)VGP      | 85   | 1.75×10 <sup>7</sup> | 442.27 | 21.48 | 441.26 | -1.7 |
| 53 | PQLL              | 87.4 | 1.70×10 <sup>7</sup> | 470.30 | 32.28 | 469.29 | -2.1 |
| 54 | AAGGF             | 89.4 | 1.65×10 <sup>7</sup> | 422.20 | 7.62  | 421.20 | -2.6 |
| 55 | QGPTGL            | 88.2 | 1.59×10 <sup>7</sup> | 572.30 | 20.35 | 571.30 | -2   |
| 56 | ASGPAGL           | 85.5 | 1.59×10 <sup>7</sup> | 572.30 | 20.35 | 571.30 | -2   |
| 57 | YPVT              | 87.1 | 1.55×10 <sup>7</sup> | 479.25 | 12.18 | 478.24 | -2.8 |
| 58 | PEGPVG            | 80.8 | 1.52×10 <sup>7</sup> | 711.37 | 20.21 | 710.36 | -1.3 |
| 59 | RGPR              | 89.8 | 1.45×10 <sup>7</sup> | 243.15 | 3.22  | 484.29 | -3.2 |
| 60 | GPVGA             | 80.4 | 1.45×10 <sup>7</sup> | 497.27 | 8.82  | 496.26 | -1.9 |
| 61 | K(+42.01)PTDLV    | 89.5 | 1.38×10 <sup>7</sup> | 714.40 | 54.12 | 713.40 | -0.9 |
| 62 | A(+42.01)LGPQG    | 86.5 | 1.33×10 <sup>7</sup> | 584.30 | 9.51  | 583.30 | -1.7 |
| 63 | APGEL             | 86.8 | 1.31×10 <sup>7</sup> | 486.26 | 12.93 | 485.25 | -1.2 |
| 64 | K(+42.01)FPS      | 89.5 | 1.30×10 <sup>7</sup> | 520.28 | 29.26 | 519.27 | -2.1 |
| 65 | YPGLA             | 81.6 | 1.30×10 <sup>7</sup> | 520.28 | 29.26 | 519.27 | -2.1 |
| 66 | A(+42.01)FGL      | 81.3 | 1.24×10 <sup>7</sup> | 449.24 | 41.67 | 448.23 | -2.2 |
| 67 | AAGEL             | 84.4 | 1.20×10 <sup>7</sup> | 460.24 | 3.29  | 459.23 | -2.3 |
| 68 | APGLGGQ           | 88.9 | 1.19×10 <sup>7</sup> | 599.31 | 10.81 | 598.31 | -2.2 |
| 69 | QPGPM             | 87.1 | 1.18×10 <sup>7</sup> | 529.24 | 12.56 | 528.24 | -1.8 |
| 70 | QPGMP             | 82.6 | 1.18×10 <sup>7</sup> | 529.24 | 12.97 | 528.24 | -1.4 |
| 71 | A(+42.01)AGPAGL   | 87.8 | 1.14×10 <sup>7</sup> | 598.32 | 22.17 | 597.31 | -1   |
| 72 | K(+42.01)PGPS     | 80.7 | 1.14×10 <sup>7</sup> | 527.28 | 13.51 | 526.28 | -2.2 |
| 73 | GFAGA             | 81.9 | 1.13×10 <sup>7</sup> | 537.23 | 21.21 | 536.22 | -1   |

|     |                   |      |                      |        |       |         |      |
|-----|-------------------|------|----------------------|--------|-------|---------|------|
| 74  | DGNPNPY           | 83.5 | 1.03×10 <sup>7</sup> | 662.28 | 20.24 | 661.27  | -1.2 |
| 75  | PSLVH             | 96.8 | 1.00×10 <sup>7</sup> | 276.66 | 6.23  | 551.31  | -2   |
| 76  | ALGL              | 85.2 | 9.93×10 <sup>6</sup> | 373.24 | 28.13 | 372.24  | -2.3 |
| 77  | LAGL              | 83.4 | 9.93×10 <sup>6</sup> | 373.24 | 28.13 | 372.24  | -2.3 |
| 78  | QVGPAGPQGPQGPAGR  | 83.1 | 9.55×10 <sup>6</sup> | 737.38 | 21.24 | 1472.75 | -0.4 |
| 79  | A(+42.01)GPQG     | 81.9 | 9.55×10 <sup>6</sup> | 726.34 | 6.37  | 725.33  | -1.4 |
| 80  | Q(+42.01)LVGPQG   | 89.6 | 9.32×10 <sup>6</sup> | 740.39 | 19.80 | 739.39  | -2.1 |
| 81  | QTGPQGL           | 82.2 | 9.00×10 <sup>6</sup> | 700.36 | 19.15 | 699.36  | 0.2  |
| 82  | TGLPR             | 97   | 8.85×10 <sup>6</sup> | 272.17 | 6.64  | 542.32  | -2.3 |
| 83  | TGLRP             | 96.1 | 8.85×10 <sup>6</sup> | 272.17 | 6.64  | 542.32  | -2.3 |
| 84  | TGRLP             | 94.9 | 8.85×10 <sup>6</sup> | 272.17 | 6.64  | 542.32  | -2.3 |
| 85  | PAGPM             | 84.2 | 8.78×10 <sup>6</sup> | 472.22 | 8.17  | 471.22  | -2.7 |
| 86  | GAPGAL            | 81.6 | 8.70×10 <sup>6</sup> | 485.27 | 12.42 | 484.26  | -2.2 |
| 87  | FGDGAE            | 83   | 8.64×10 <sup>6</sup> | 595.23 | 11.56 | 594.23  | -3.1 |
| 88  | RGPAGM            | 80.9 | 8.37×10 <sup>6</sup> | 588.29 | 2.99  | 587.29  | -1.9 |
| 89  | A(+42.01)LGPQ     | 80.5 | 8.17×10 <sup>6</sup> | 527.28 | 10.26 | 526.28  | -2.7 |
| 90  | K(+42.01)LGQ      | 80.7 | 8.11×10 <sup>6</sup> | 487.29 | 23.85 | 486.28  | -2.4 |
| 91  | VGPEGPVG          | 85   | 7.87×10 <sup>6</sup> | 711.37 | 20.21 | 710.36  | -1.3 |
| 92  | APGPL             | 84.6 | 7.87×10 <sup>6</sup> | 454.26 | 20.55 | 453.26  | -2.6 |
| 93  | PLMP              | 81.9 | 7.81×10 <sup>6</sup> | 457.25 | 29.26 | 456.24  | -2.8 |
| 94  | Q(+42.01)LVGPQ    | 92.4 | 7.59×10 <sup>6</sup> | 683.37 | 19.15 | 682.37  | -1   |
| 95  | N(+0.98)LVR       | 94.7 | 7.50×10 <sup>6</sup> | 251.65 | 8.45  | 501.29  | -3.5 |
| 96  | DLVR              | 94.5 | 7.50×10 <sup>6</sup> | 251.65 | 8.45  | 501.29  | -3.5 |
| 97  | N(+0.98)VLR       | 92.8 | 7.50×10 <sup>6</sup> | 251.65 | 8.45  | 501.29  | -3.5 |
| 98  | DVLR              | 91.4 | 7.50×10 <sup>6</sup> | 251.65 | 8.45  | 501.29  | -3.5 |
| 99  | M(+42.01)DTLK     | 96.5 | 7.36×10 <sup>6</sup> | 649.32 | 26.34 | 648.32  | -1.1 |
| 100 | T(+42.01)KPR      | 83.6 | 7.24×10 <sup>6</sup> | 272.17 | 7.59  | 542.32  | -2.1 |
| 101 | GPAGPTGPTGPAQAGER | 85.1 | 7.04×10 <sup>6</sup> | 760.88 | 20.11 | 1519.74 | -1.6 |
| 102 | EGVGPQ            | 83.2 | 6.93×10 <sup>6</sup> | 586.28 | 5.62  | 585.28  | -1   |
| 103 | VPLYEG            | 87.2 | 6.86×10 <sup>6</sup> | 677.35 | 29.67 | 676.34  | -2.9 |
| 104 | Q(+42.01)PGPSGL   | 83.4 | 6.71×10 <sup>6</sup> | 697.35 | 22.41 | 696.34  | -0.5 |
| 105 | QGPGL             | 86.8 | 6.68×10 <sup>6</sup> | 600.30 | 11.94 | 599.29  | -2   |
| 106 | K(+42.01)VGEA     | 85.7 | 6.61×10 <sup>6</sup> | 545.29 | 17.36 | 544.29  | -3.1 |
| 107 | FRGP              | 95.8 | 6.58×10 <sup>6</sup> | 238.63 | 2.92  | 475.25  | -2.9 |
| 108 | GPLGPS            | 81.4 | 6.44×10 <sup>6</sup> | 527.28 | 11.90 | 526.28  | -2.7 |
| 109 | LAVVD             | 83.5 | 6.36×10 <sup>6</sup> | 516.30 | 26.45 | 515.30  | -2.1 |
| 110 | APLNPK            | 94.5 | 6.33×10 <sup>6</sup> | 320.19 | 3.22  | 638.38  | -2.9 |
| 111 | APLNKP            | 90.7 | 6.33×10 <sup>6</sup> | 320.19 | 3.22  | 638.38  | -2.9 |
| 112 | FGPR              | 89.6 | 6.32×10 <sup>6</sup> | 238.63 | 6.20  | 475.25  | -3.2 |
| 113 | LPTNL             | 87.4 | 6.31×10 <sup>6</sup> | 557.33 | 35.08 | 556.32  | -1.2 |
| 114 | ATGPEGL           | 83.7 | 5.95×10 <sup>6</sup> | 644.32 | 23.20 | 643.32  | -1.4 |
| 115 | K(+42.01)PTNL     | 85.4 | 5.76×10 <sup>6</sup> | 614.35 | 43.91 | 613.34  | -2.6 |
| 116 | A(+42.01)GER      | 98   | 5.71×10 <sup>6</sup> | 237.62 | 3.02  | 473.22  | -2.6 |
| 117 | GPLGPSGP          | 81.9 | 5.61×10 <sup>6</sup> | 796.38 | 24.84 | 795.38  | -2   |
| 118 | PGLGPSGP          | 80.7 | 5.61×10 <sup>6</sup> | 681.36 | 25.96 | 680.35  | -1.1 |

|     |                    |      |                      |        |       |         |      |
|-----|--------------------|------|----------------------|--------|-------|---------|------|
| 119 | K(+42.01)TGVQ      | 84.4 | 5.58×10 <sup>6</sup> | 574.32 | 13.75 | 573.31  | -2.2 |
| 120 | HGLV               | 87.8 | 5.57×10 <sup>6</sup> | 425.25 | 1.38  | 424.24  | -2.1 |
| 121 | PTGL               | 81.3 | 5.53×10 <sup>6</sup> | 387.22 | 7.70  | 386.22  | -2.7 |
| 122 | QLGGL              | 88.4 | 5.47×10 <sup>6</sup> | 487.29 | 29.53 | 486.28  | -3.7 |
| 123 | LQVR               | 95.5 | 5.34×10 <sup>6</sup> | 258.17 | 0.25  | 514.32  | -3.1 |
| 124 | APGPAGAA           | 83.4 | 5.24×10 <sup>6</sup> | 611.31 | 7.66  | 610.31  | -2.4 |
| 125 | PSGPLGPSGP         | 86.5 | 5.23×10 <sup>6</sup> | 865.44 | 29.40 | 864.43  | -2.4 |
| 126 | A(+42.01)AGPLGPSGP | 85.9 | 5.23×10 <sup>6</sup> | 865.44 | 29.40 | 864.43  | -2.4 |
| 127 | YPQA               | 80.5 | 5.07×10 <sup>6</sup> | 478.23 | 8.45  | 477.22  | -2.6 |
| 128 | GFRGPR             | 93.1 | 5.04×10 <sup>6</sup> | 230.47 | 3.22  | 688.38  | -3.1 |
| 129 | A(+42.01)GPR       | 98   | 4.91×10 <sup>6</sup> | 221.62 | 6.29  | 441.23  | -3   |
| 130 | A(+42.01)PAAA      | 88   | 4.89×10 <sup>6</sup> | 442.23 | 25.66 | 441.22  | -2.7 |
| 131 | QSPSGTGPGQLQQR     | 82.8 | 4.77×10 <sup>6</sup> | 720.86 | 14.23 | 1439.71 | -1.5 |
| 132 | YPQAVS             | 80.9 | 4.62×10 <sup>6</sup> | 664.33 | 15.02 | 663.32  | -1.4 |
| 133 | A(+42.01)GPQ       | 84.3 | 4.53×10 <sup>6</sup> | 414.20 | 11.11 | 413.19  | -1.9 |
| 134 | Q(+42.01)AGP       | 80.4 | 4.53×10 <sup>6</sup> | 770.35 | 17.67 | 769.34  | -1.6 |
| 135 | VPLE               | 81.1 | 4.49×10 <sup>6</sup> | 457.26 | 12.90 | 456.26  | -2   |
| 136 | PYAYP              | 81.1 | 4.46×10 <sup>6</sup> | 610.29 | 32.07 | 609.28  | -1.1 |
| 137 | ALGGY              | 85.8 | 4.44×10 <sup>6</sup> | 480.24 | 19.39 | 479.24  | -2.7 |
| 138 | LTGPVG             | 82.7 | 4.34×10 <sup>6</sup> | 543.31 | 17.25 | 542.31  | -2.1 |
| 139 | EGLGPM(+15.99)     | 80.6 | 4.33×10 <sup>6</sup> | 619.27 | 11.08 | 618.27  | -2.3 |
| 140 | DRLL               | 94.8 | 4.28×10 <sup>6</sup> | 258.66 | 17.50 | 515.31  | -3.1 |
| 141 | DLRL               | 88.9 | 4.28×10 <sup>6</sup> | 258.66 | 17.50 | 515.31  | -3.1 |
| 142 | ALGGF              | 85.7 | 4.28×10 <sup>6</sup> | 464.25 | 34.33 | 463.24  | -2.5 |
| 143 | ALGVE              | 84.1 | 4.27×10 <sup>6</sup> | 488.27 | 13.69 | 487.26  | -2.3 |
| 144 | RN(+0.98)LL        | 80.8 | 4.26×10 <sup>6</sup> | 258.66 | 18.42 | 515.31  | -2.8 |
| 145 | EGMGPM             | 80.9 | 4.24×10 <sup>6</sup> | 621.24 | 23.75 | 620.23  | -1.1 |
| 146 | LPTDLV             | 89.8 | 4.21×10 <sup>6</sup> | 657.38 | 50.10 | 656.37  | -1.9 |
| 147 | K(+42.01)VGPEG     | 84.3 | 4.20×10 <sup>6</sup> | 628.33 | 21.79 | 627.32  | -0.9 |
| 148 | PAYGV              | 84   | 4.07×10 <sup>6</sup> | 506.26 | 18.56 | 505.25  | -1.8 |
| 149 | VDRL               | 90.7 | 4.03×10 <sup>6</sup> | 251.65 | 3.19  | 501.29  | -3.3 |
| 150 | APGEF              | 88   | 3.99×10 <sup>6</sup> | 520.24 | 17.29 | 519.23  | -3   |
| 151 | ALGAM              | 83.3 | 3.97×10 <sup>6</sup> | 462.24 | 16.74 | 461.23  | -2.7 |
| 152 | ASGPAGM            | 83.8 | 3.92×10 <sup>6</sup> | 590.26 | 11.15 | 589.25  | -1.3 |
| 153 | K(+42.01)DTGAQ     | 83.1 | 3.75×10 <sup>6</sup> | 661.31 | 6.67  | 660.31  | -0.8 |
| 154 | K(+42.01)PTD       | 80   | 3.70×10 <sup>6</sup> | 502.25 | 14.50 | 501.24  | -2.3 |
| 155 | APGPLGPSGP         | 88.5 | 3.60×10 <sup>6</sup> | 964.47 | 31.90 | 963.47  | -1.9 |
| 156 | Q(+42.01)AAG       | 80.4 | 3.60×10 <sup>6</sup> | 388.18 | 13.82 | 387.18  | -3.7 |
| 157 | VGGF               | 85.9 | 3.58×10 <sup>6</sup> | 379.20 | 16.50 | 378.19  | -2.3 |
| 158 | A(+42.01)AGPM      | 83.3 | 3.57×10 <sup>6</sup> | 488.22 | 6.81  | 487.21  | -1.7 |
| 159 | WGPW               | 82.1 | 3.28×10 <sup>6</sup> | 642.31 | 14.52 | 641.30  | 7.4  |
| 160 | LSVPH              | 90.6 | 3.22×10 <sup>6</sup> | 276.66 | 10.30 | 551.31  | -3.1 |
| 161 | SLVPH              | 88.1 | 3.22×10 <sup>6</sup> | 276.66 | 10.30 | 551.31  | -3.1 |
| 162 | LVGPQG             | 86   | 3.19×10 <sup>6</sup> | 570.32 | 10.98 | 569.32  | -2   |
| 163 | K(+42.01)VGPE      | 82.6 | 3.15×10 <sup>6</sup> | 571.31 | 21.38 | 570.30  | -1.2 |

|     |                          |      |                      |        |       |         |      |
|-----|--------------------------|------|----------------------|--------|-------|---------|------|
| 164 | LGVGPE                   | 80.5 | 3.15×10 <sup>6</sup> | 571.31 | 21.38 | 570.30  | -1.1 |
| 165 | R(+42.01)AGPSGL          | 89.9 | 3.14×10 <sup>6</sup> | 350.19 | 8.99  | 698.37  | -2.3 |
| 166 | KGPVV                    | 89.4 | 3.14×10 <sup>6</sup> | 499.32 | 1.62  | 498.32  | -2.3 |
| 167 | QVGPAGP                  | 91.4 | 2.87×10 <sup>6</sup> | 753.39 | 12.69 | 752.38  | -1.5 |
| 168 | AGVGPAGP                 | 89.3 | 2.87×10 <sup>6</sup> | 625.33 | 15.06 | 624.32  | -1.1 |
| 169 | A(+42.01)AGPAGPM(+15.99) | 83.6 | 2.86×10 <sup>6</sup> | 729.32 | 7.15  | 728.32  | -0.3 |
| 170 | K(+42.01)GYPE            | 80.9 | 2.86×10 <sup>6</sup> | 635.30 | 27.10 | 634.30  | -1.6 |
| 171 | QTGGF                    | 85.5 | 2.74×10 <sup>6</sup> | 509.23 | 10.57 | 508.23  | -3.6 |
| 172 | QVGPAGPQ                 | 90.8 | 2.73×10 <sup>6</sup> | 753.39 | 12.69 | 752.38  | -1.5 |
| 173 | A(+42.01)PLD             | 88.4 | 2.73×10 <sup>6</sup> | 457.23 | 33.72 | 456.22  | -2.1 |
| 174 | WEQG                     | 81.4 | 2.72×10 <sup>6</sup> | 519.22 | 23.90 | 518.21  | -2.6 |
| 175 | VSLPR                    | 94.9 | 2.65×10 <sup>6</sup> | 286.18 | 14.27 | 570.35  | -2.8 |
| 176 | EGGPL                    | 90.7 | 2.64×10 <sup>6</sup> | 472.24 | 20.75 | 471.23  | -2.4 |
| 177 | Q(+42.01)LVGPGAG         | 85.2 | 2.62×10 <sup>6</sup> | 740.39 | 18.36 | 739.39  | -1.3 |
| 178 | SLLR                     | 93   | 2.61×10 <sup>6</sup> | 244.66 | 6.84  | 487.31  | -2.2 |
| 179 | K(+42.01)VGED            | 80.3 | 2.60×10 <sup>6</sup> | 589.28 | 16.78 | 588.28  | -1.8 |
| 180 | PSGPAGP                  | 84   | 2.55×10 <sup>6</sup> | 582.29 | 7.06  | 581.28  | -1.5 |
| 181 | ATRLP                    | 98.2 | 2.51×10 <sup>6</sup> | 279.17 | 7.87  | 556.33  | -2.5 |
| 182 | ESSVH                    | 81.6 | 2.49×10 <sup>6</sup> | 657.32 | 11.11 | 656.31  | -1.4 |
| 183 | AAKLLT                   | 90.3 | 2.48×10 <sup>6</sup> | 308.70 | 8.35  | 615.40  | -2.4 |
| 184 | DLLSR                    | 88.9 | 2.47×10 <sup>6</sup> | 603.35 | 15.85 | 602.34  | -1.6 |
| 185 | LDRL                     | 90   | 2.40×10 <sup>6</sup> | 258.66 | 9.51  | 515.31  | -2.6 |
| 186 | PLAP                     | 83.6 | 2.40×10 <sup>6</sup> | 397.24 | 17.88 | 396.24  | -2.9 |
| 187 | LPGEL                    | 85.4 | 2.33×10 <sup>6</sup> | 528.30 | 32.24 | 527.30  | -1.7 |
| 188 | TPLHG                    | 89.1 | 2.31×10 <sup>6</sup> | 262.64 | 6.20  | 523.28  | -2.6 |
| 189 | QTGPEGL                  | 85.6 | 2.22×10 <sup>6</sup> | 701.35 | 23.85 | 700.34  | -0.2 |
| 190 | GPAGPTGPTGRPQ            | 81.5 | 2.20×10 <sup>6</sup> | 596.81 | 12.07 | 1191.60 | -1.5 |
| 191 | LPEGGP                   | 86.4 | 2.14×10 <sup>6</sup> | 682.38 | 40.24 | 681.37  | -1.9 |
| 192 | APGPLGPSGDP              | 89   | 2.13×10 <sup>6</sup> | 964.47 | 31.90 | 963.47  | -1.9 |
| 193 | APGPLGPSGPD              | 85.8 | 2.13×10 <sup>6</sup> | 964.47 | 31.90 | 963.47  | -1.9 |
| 194 | QGLTGVPV                 | 81.6 | 2.08×10 <sup>6</sup> | 728.39 | 27.82 | 727.39  | -1.4 |
| 195 | A(+42.01)GQR             | 80.6 | 2.06×10 <sup>6</sup> | 237.13 | 5.55  | 472.24  | -2.5 |
| 196 | AVGGF                    | 83.5 | 2.05×10 <sup>6</sup> | 450.23 | 21.76 | 449.23  | -2   |
| 197 | A(+42.01)GPEGL           | 83.3 | 2.05×10 <sup>6</sup> | 585.29 | 43.39 | 584.28  | -1.3 |
| 198 | QVGPAGPQGPQGPAGQR        | 80.8 | 2.04×10 <sup>6</sup> | 801.41 | 22.48 | 1600.81 | -0.4 |
| 199 | ALGF                     | 83.8 | 1.85×10 <sup>6</sup> | 407.23 | 33.20 | 406.22  | -3.5 |
| 200 | YPQAM                    | 84.8 | 1.81×10 <sup>6</sup> | 609.27 | 19.84 | 608.26  | -1.9 |
| 201 | LVGPQ                    | 86.9 | 1.80×10 <sup>6</sup> | 513.30 | 9.89  | 512.30  | -1.7 |
| 202 | K(+42.01)PTDL            | 88.4 | 1.78×10 <sup>6</sup> | 615.33 | 43.50 | 614.33  | -1.4 |
| 203 | GPVGPAGP                 | 80   | 1.65×10 <sup>6</sup> | 651.34 | 17.84 | 650.34  | -1.6 |
| 204 | AYPVT                    | 85.5 | 1.63×10 <sup>6</sup> | 550.29 | 15.36 | 549.28  | -1.6 |
| 205 | KLVVG                    | 86.6 | 1.62×10 <sup>6</sup> | 515.35 | 7.43  | 514.35  | -1.7 |
| 206 | PGDGR                    | 93.2 | 1.61×10 <sup>6</sup> | 251.12 | 7.25  | 500.23  | -2.7 |
| 207 | PLMD                     | 80   | 1.57×10 <sup>6</sup> | 475.22 | 17.53 | 474.21  | -3.1 |
| 208 | PEVP                     | 83.7 | 1.56×10 <sup>6</sup> | 441.23 | 11.05 | 440.23  | -2.7 |

|     |                        |      |                      |        |       |         |      |
|-----|------------------------|------|----------------------|--------|-------|---------|------|
| 209 | EPVP                   | 82.8 | 1.56×10 <sup>6</sup> | 441.23 | 11.05 | 440.23  | -2.7 |
| 210 | GPLGPSGPD              | 85.9 | 1.55×10 <sup>6</sup> | 796.38 | 25.59 | 795.38  | -2.2 |
| 211 | LEGPL                  | 83.2 | 1.49×10 <sup>6</sup> | 528.30 | 30.66 | 527.30  | -1.4 |
| 212 | Q(+42.01)AGPAGPM       | 81.7 | 1.48×10 <sup>6</sup> | 770.35 | 17.67 | 769.34  | -1.6 |
| 213 | PVLR                   | 87.6 | 1.44×10 <sup>6</sup> | 242.66 | 0.01  | 483.32  | -4.4 |
| 214 | M(+15.99)SGLPR         | 90.2 | 1.42×10 <sup>6</sup> | 338.68 | 6.88  | 675.34  | -1.9 |
| 215 | LPEGGPL                | 89.7 | 1.40×10 <sup>6</sup> | 682.38 | 40.24 | 681.37  | -1.9 |
| 216 | A(+42.01)FGT           | 88.1 | 1.36×10 <sup>6</sup> | 437.20 | 31.14 | 436.20  | -2   |
| 217 | A(+42.01)AGPLGPSGPD    | 84.2 | 1.36×10 <sup>6</sup> | 980.47 | 26.89 | 979.46  | -2   |
| 218 | QLDGL                  | 83.8 | 1.33×10 <sup>6</sup> | 545.29 | 35.39 | 544.29  | -0.8 |
| 219 | YLPR                   | 93   | 1.32×10 <sup>6</sup> | 274.66 | 6.16  | 547.31  | -2.5 |
| 220 | TPELA                  | 91.6 | 1.31×10 <sup>6</sup> | 530.28 | 14.71 | 529.27  | -2.6 |
| 221 | LPVH                   | 95.6 | 1.27×10 <sup>6</sup> | 233.14 | 5.82  | 464.27  | -2.3 |
| 222 | PGDR                   | 96.3 | 1.26×10 <sup>6</sup> | 222.61 | 6.81  | 443.21  | -2.8 |
| 223 | DPLL                   | 80.2 | 1.22×10 <sup>6</sup> | 457.26 | 41.61 | 456.26  | -2.9 |
| 224 | K(+42.01)VGEAGE        | 86.6 | 1.21×10 <sup>6</sup> | 731.36 | 21.69 | 730.35  | 0.4  |
| 225 | A(+42.01)GAG           | 84.8 | 1.16×10 <sup>6</sup> | 317.14 | 11.32 | 316.14  | -3.1 |
| 226 | EGLTGPVG               | 84.2 | 1.12×10 <sup>6</sup> | 729.38 | 34.06 | 728.37  | -0.9 |
| 227 | GPVGPAGPL              | 81.7 | 1.11×10 <sup>6</sup> | 764.43 | 43.15 | 763.42  | -0.4 |
| 228 | LEGLE                  | 82.6 | 9.99×10 <sup>5</sup> | 560.29 | 20.21 | 559.29  | -2   |
| 229 | PAGPR                  | 91.7 | 9.71×10 <sup>5</sup> | 249.14 | 5.92  | 496.28  | -2.3 |
| 230 | TM(+15.99)PVLLTEALPNPK | 82.6 | 9.58×10 <sup>5</sup> | 770.43 | 65.01 | 1538.84 | 5.4  |
| 231 | TM(+15.99)PVLLTEALPNPK | 80.8 | 9.58×10 <sup>5</sup> | 770.43 | 65.01 | 1538.84 | 5.4  |
| 232 | P(+42.01)CGPM          | 85.6 | 9.26×10 <sup>5</sup> | 546.21 | 42.19 | 545.20  | -0.1 |
| 233 | LAHLTG                 | 88.9 | 9.10×10 <sup>5</sup> | 306.18 | 11.01 | 610.34  | -2.2 |
| 234 | VPLYE                  | 89.9 | 8.91×10 <sup>5</sup> | 620.33 | 33.20 | 619.32  | -2.2 |
| 235 | LGYPK                  | 92.7 | 8.80×10 <sup>5</sup> | 289.17 | 9.61  | 576.33  | -1.4 |
| 236 | DYAGGK                 | 85.2 | 8.34×10 <sup>5</sup> | 305.65 | 32.07 | 609.28  | 4.9  |
| 237 | ATPAVE                 | 81   | 8.15×10 <sup>5</sup> | 587.30 | 8.96  | 586.30  | -2.2 |
| 238 | PLVP                   | 84.5 | 7.72×10 <sup>5</sup> | 425.27 | 33.89 | 424.27  | -2.7 |
| 239 | HCLST                  | 85.6 | 6.67×10 <sup>5</sup> | 560.25 | 25.45 | 559.24  | 8.5  |
| 240 | LGVGPVG                | 84   | 6.64×10 <sup>5</sup> | 598.35 | 32.69 | 597.35  | -2.5 |
| 241 | A(+42.01)LGPF          | 83.5 | 6.27×10 <sup>5</sup> | 546.29 | 43.33 | 545.28  | -1.5 |
| 242 | GLHLP                  | 85.4 | 5.96×10 <sup>5</sup> | 268.66 | 51.37 | 535.31  | -1.2 |
| 243 | HLGLP                  | 85.4 | 5.96×10 <sup>5</sup> | 268.66 | 51.37 | 535.31  | -1.2 |
| 244 | K(+42.01)HLP           | 85.2 | 5.96×10 <sup>5</sup> | 268.66 | 51.37 | 535.31  | -1.2 |
| 245 | ALRLP                  | 97.4 | 5.82×10 <sup>5</sup> | 285.19 | 50.99 | 568.37  | -0.7 |
| 246 | A(+42.01)PEV           | 80.3 | 4.74×10 <sup>5</sup> | 457.23 | 36.39 | 456.22  | -2.3 |
| 247 | K(+42.01)VGPL          | 89.3 | 2.77×10 <sup>5</sup> | 555.35 | 50.65 | 554.34  | -1.1 |
| 248 | EVLTL                  | 82.5 | 2.53×10 <sup>5</sup> | 574.34 | 64.24 | 573.34  | -0.2 |
| 249 | Q(+42.01)PSQ           | 82.6 | 1.90×10 <sup>5</sup> | 501.23 | 9.47  | 500.22  | -1.5 |
| 250 | TLRL                   | 87.7 | 1.89×10 <sup>5</sup> | 251.67 | 5.51  | 501.33  | -3.7 |
| 251 | EHPVLL                 | 81.2 | 1.89×10 <sup>5</sup> | 354.21 | 65.45 | 706.40  | -0.5 |
| 252 | LPGYL                  | 80.3 | 1.70×10 <sup>5</sup> | 562.32 | 57.49 | 561.32  | -0.5 |
| 253 | LPLDLL                 | 82.4 | 1.69×10 <sup>5</sup> | 683.43 | 66.60 | 682.43  | 1.1  |

|     |                           |      |                    |        |       |        |      |
|-----|---------------------------|------|--------------------|--------|-------|--------|------|
| 254 | ELVVLPE                   | 92   | $1.64 \times 10^5$ | 399.73 | 55.25 | 797.45 | -1.9 |
| 255 | TLPL                      | 81.6 | $9.67 \times 10^4$ | 443.28 | 34.64 | 442.28 | -3.9 |
|     | <b>Total 255 peptides</b> |      |                    |        |       |        |      |

**Table S2** Feed intake of normal model mice experiment

| Groups | 1 <sup>st</sup> week | 2 <sup>nd</sup> week | 3 <sup>rd</sup> week | 4 <sup>th</sup> week | 5 <sup>th</sup> week | 6 <sup>th</sup> week |
|--------|----------------------|----------------------|----------------------|----------------------|----------------------|----------------------|
| CON    | 5.02±0.33            | 4.72±1.47            | 5.97±1.93            | 6.19±0.83            | 5.92±1.14            | 5.17±1.26            |
| SIF    | 5.45±0.29            | 7.53±1.50            | 6.03±0.63            | 6.53±0.51            | 5.88±0.68            | 5.94±0.65            |
| SCPL   | 6.77±1.49            | 7.34±0.04            | 6.87±1.18            | 5.19±0.08            | 6.43±0.44            | 5.81±0.08            |
| SCPH   | 4.97±1.89            | 6.27±2.14            | 5.42±1.74            | 5.65±0.27            | 5.34±0.52            | 5.16±1.11            |

**Table S3** Feed intake of POF model mice experiment

| Groups   | 1 <sup>st</sup> week | 2 <sup>nd</sup> week | 3 <sup>rd</sup> week | 4 <sup>th</sup> week | 5 <sup>th</sup> week |
|----------|----------------------|----------------------|----------------------|----------------------|----------------------|
| CON      | 5.69±2.75            | 5.64±2.62            | 4.82±1.41            | 5.51±0.76            | 4.77±1.12            |
| POF      | 6.37±1.40            | 6.42±0.57            | 5.29±1.28            | 4.52±0.40            | 5.83±0.34            |
| POF+SIF  | 7.30±1.04            | 6.16±0.90            | 6.32±0.56            | 6.78±0.19            | 6.30±0.11            |
| POF+SCPL | 8.29±0.88            | 6.13±0.59            | 4.49±0.18            | 3.79±0.04            | 4.50±0.47            |
| POF+SCPH | 7.33±0.63            | 6.39±0.82            | 5.55±1.53            | 5.84±1.06            | 5.88±0.61            |

**Table S4** Organ index of normal model mice experiment

| Groups | Organ index (%) |           |           |
|--------|-----------------|-----------|-----------|
|        | Liver           | Kidney    | Spleen    |
| CON    | 3.69±0.31       | 1.09±0.07 | 0.36±0.09 |
| SIF    | 2.51±0.33       | 1.10±0.11 | 0.36±0.07 |
| SCPL   | 3.37±0.34       | 1.07±0.15 | 0.31±0.03 |
| SCPH   | 3.60±0.30       | 1.06±0.06 | 0.36±0.07 |

**Table S5** Organ index of POF model mice experiment

| Groups   | Organ index (%) |           |           |
|----------|-----------------|-----------|-----------|
|          | Liver           | Kidney    | Spleen    |
| CON      | 3.69±0.24       | 1.12±0.12 | 0.35±0.04 |
| POF      | 3.68±0.22       | 1.06±0.10 | 0.36±0.08 |
| POF+SIF  | 3.78±0.33       | 1.12±0.11 | 0.37±0.07 |
| POF+SCPL | 3.65±0.26       | 1.10±0.09 | 0.37±0.05 |
| POF+SCPH | 3.51±0.18       | 1.06±0.09 | 0.36±0.07 |



A

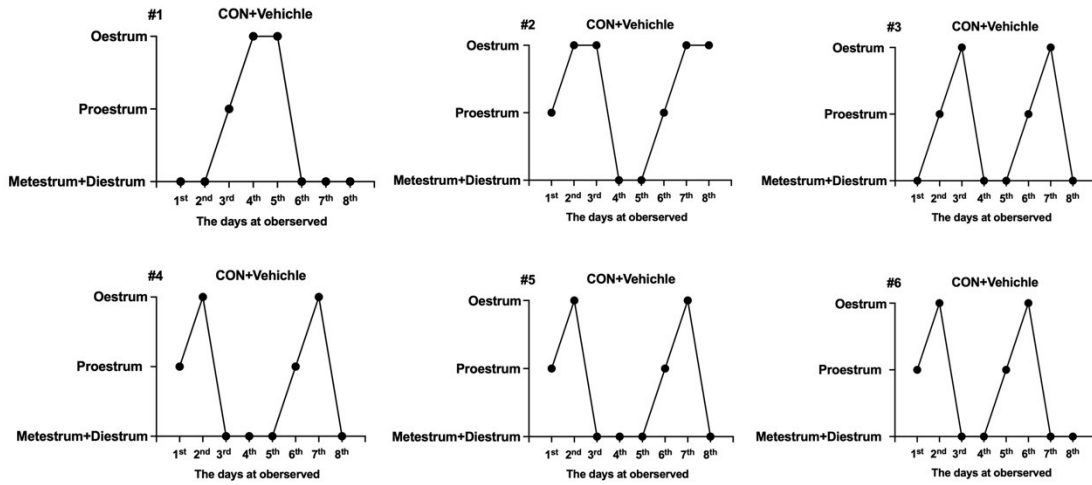

B

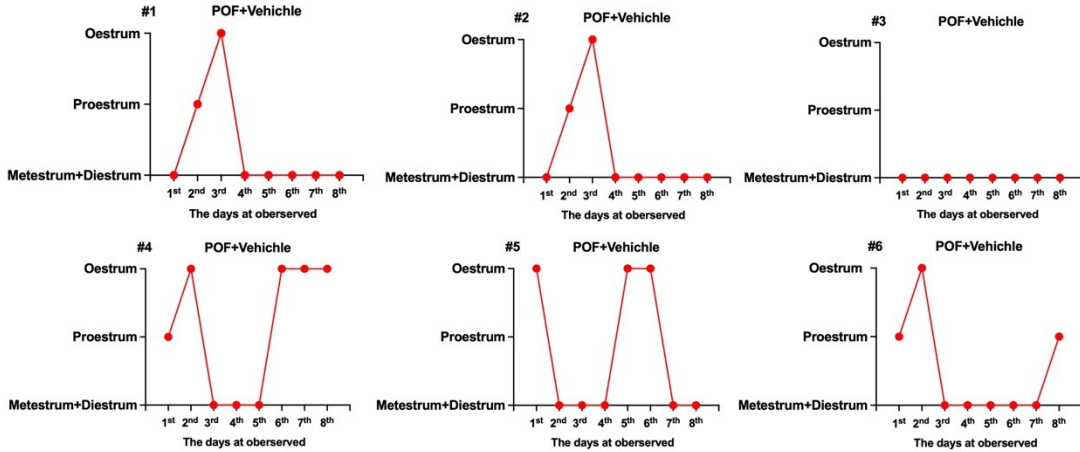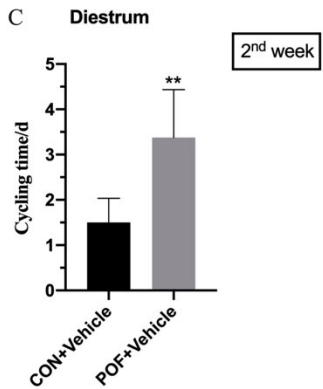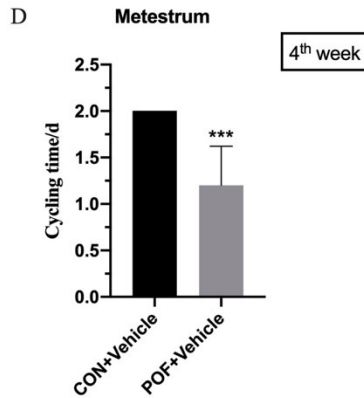

Figure S2 The comparison of the estrous cycle between CON and POF groups. (A) estrous cycle of mice in the CON+Vehicle group at 4<sup>th</sup> week. (B) estrous cycle of mice in the POF+Vehicle group at 4<sup>th</sup> week. (C) The counting days of diestrum at 2<sup>nd</sup> week. (D) The counting days of metestrum at 4<sup>th</sup> week.

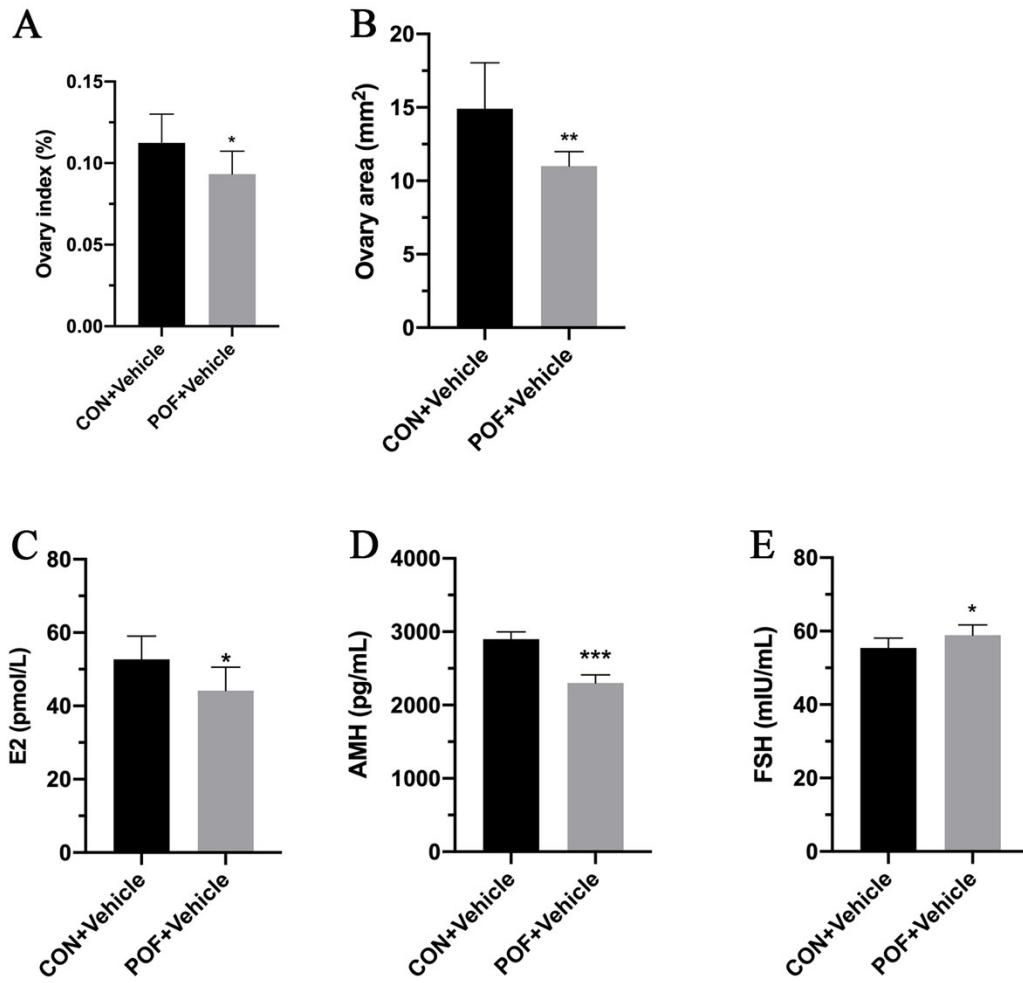

Figure S3 The comparison of ovary indexes and hormone level between CON+Vehicle and POF+Vehicle group. Compared with CON+Vehicle group, \* indicated  $p < 0.05$ , \*\* indicated  $p < 0.01$ .
